# Supplementary material
Source: publisher figshare collection journal article supplement (https://diabetesjournals.figshare.com/articles/dataset/_/21801145)

**Supplementary Table 1** Mean and its 95% confidence interval of plasma amino acids among GDM cases and non-GDM controls at 10-14 and 15-26 weeks of gestation, the NICHD Fetal Growth Studies-Singleton Cohort

|                                  | <b>Mean (95% confidence interval), umol/dL</b> |                    |                        |                                |                   |                        |
|----------------------------------|------------------------------------------------|--------------------|------------------------|--------------------------------|-------------------|------------------------|
|                                  | <b>10-14 gestational weeks</b>                 |                    |                        | <b>15-26 gestational weeks</b> |                   |                        |
| <b>Amino acids</b>               | <b>Controls (n=214)</b>                        | <b>GDM (n=104)</b> | <b><i>p</i>-value*</b> | <b>Controls (n=214)</b>        | <b>GDM (n=94)</b> | <b><i>p</i>-value*</b> |
| Glycine                          | 14.6 (14.2, 15.1)                              | 12.8 (12.2, 13.4)  | <0.0001                | 14.6 (14.2, 15.2)              | 13.1 (12.4, 13.7) | 0.0009                 |
| Alanine                          | 28.6 (27.9, 29.4)                              | 30.4 (29.2, 31.5)  | 0.01                   | 28.5 (27.7, 29.3)              | 30.0 (28.8, 31.1) | 0.03                   |
| Aspartic acid                    | 0.69 (0.63, 0.74)                              | 0.84 (0.76, 0.91)  | 0.002                  | 0.97 (0.87, 1.07)              | 1.13 (1.01, 1.25) | 0.004                  |
| Asparagine                       | 5.18 (4.98, 5.39)                              | 4.88 (4.60, 5.16)  | 0.07                   | 4.33 (4.14, 4.51)              | 4.11 (3.88, 4.34) | 0.05                   |
| Arginine                         | 5.45 (5.13, 5.78)                              | 5.71 (5.28, 6.14)  | 0.29                   | 6.47 (5.95, 6.99)              | 6.97 (6.30, 7.63) | 0.13                   |
| Glutamine                        | 32.8 (31.4, 34.2)                              | 32.4 (30.6, 34.1)  | 0.61                   | 27.5 (25.3, 29.7)              | 25.9 (23.5, 28.3) | 0.05                   |
| Glutamic acid                    | 11.8 (10.6, 13.0)                              | 12.9 (11.5, 14.4)  | 0.07                   | 15.8 (13.9, 17.8)              | 18.1 (16.0, 20.3) | 0.004                  |
| Glutamine-to-glutamic acid-ratio | 4.48 (3.94, 5.02)                              | 3.77 (3.13, 4.42)  | 0.02                   | 3.98 (3.25, 4.70)              | 3.01 (2.15, 3.87) | 0.009                  |
| Threonine                        | 12.1 (11.7, 12.5)                              | 12.9 (12.3, 13.4)  | 0.02                   | 15.0 (14.7, 15.4)              | 15.4 (14.9, 16.0) | 0.26                   |
| Serine                           | 7.77 (7.53, 8.01)                              | 7.37 (7.05, 7.70)  | 0.04                   | 8.30 (7.91, 8.49)              | 8.22 (7.83, 8.61) | 0.92                   |
| Methionine                       | 1.85 (1.78, 1.92)                              | 1.81 (1.71, 1.91)  | 0.49                   | 1.80 (1.74, 1.85)              | 1.88 (1.81, 1.96) | 0.03                   |
| Histidine                        | 6.99 (6.84, 7.14)                              | 6.77 (6.55, 6.99)  | 0.10                   | 6.97 (6.80, 7.14)              | 6.82 (6.57, 7.06) | 0.28                   |
| Lysine                           | 15.2 (14.7, 15.7)                              | 15.6 (14.9, 16.2)  | 0.34                   | 14.8 (14.5, 15.1)              | 15.3 (14.8, 15.8) | 0.11                   |

|                              | Mead (95% confidence interval), umol/dL |                   |                  |                         |                   |                  |
|------------------------------|-----------------------------------------|-------------------|------------------|-------------------------|-------------------|------------------|
|                              | 10-14 gestational weeks                 |                   |                  | 15-26 gestational weeks |                   |                  |
| Amino acids                  | Controls (n=214)                        | GDM (n=104)       | <i>p</i> -value* | Controls (n=214)        | GDM (n=94)        | <i>p</i> -value* |
| Proline                      | 13.3 (12.8, 13.8)                       | 13.0 (12.3, 13.7) | 0.48             | 12.1 (11.7, 12.6)       | 11.8 (11.1, 12.4) | 0.34             |
| BCAAs                        |                                         |                   |                  |                         |                   |                  |
| Valine                       | 18.6 (18.0, 19.3)                       | 19.1 (18.2, 20.0) | 0.40             | 16.1 (15.8, 16.5)       | 16.9 (16.5, 17.4) | 0.007            |
| Leucine                      | 9.59 (9.16, 10.0)                       | 9.42 (8.83, 10.0) | 0.64             | 8.24 (8.07, 8.41)       | 8.49 (8.23, 8.74) | 0.11             |
| Isoleucine                   | 5.37 (5.10, 5.64)                       | 5.37 (5.00, 5.74) | 0.99             | 4.80 (4.68, 4.92)       | 5.11 (4.94, 5.29) | 0.002            |
| Summed BCAAs†                | 33.6 (32.4, 34.8)                       | 33.9 (32.1, 35.6) | 0.79             | 29.2 (28.6, 29.7)       | 30.5 (29.7, 31.4) | 0.008            |
| Aromatic amino acids         |                                         |                   |                  |                         |                   |                  |
| Phenylalanine                | 5.31 (5.16, 5.47)                       | 5.29 (5.07, 5.50) | 0.83             | 4.63 (4.52, 4.73)       | 4.70 (4.55, 4.86) | 0.39             |
| Tyrosine                     | 4.70 (4.50, 4.89)                       | 4.90 (4.62, 5.18) | 0.24             | 3.94 (3.85, 4.03)       | 4.25 (4.13, 4.40) | <0.0001          |
| Summed aromatic amino acids‡ | 10.0 (9.69, 10.3)                       | 10.2 (9.73, 10.6) | 0.54             | 8.57 (8.40, 8.73)       | 8.97 (8.73, 9.20) | 0.004            |
| Others                       |                                         |                   |                  |                         |                   |                  |
| Taurine                      | 9.16 (8.48, 9.84)                       | 10.6 (9.62, 11.6) | 0.02             | 7.88 (7.29, 8.48)       | 8.58 (7.68, 9.48) | 0.20             |
| Citrulline                   | 1.77 (1.71, 1.83)                       | 1.77 (1.69, 1.85) | 0.08             | 1.67 (1.62, 1.73)       | 1.69 (1.62, 1.76) | 0.70             |
| Ornithine                    | 3.01 (2.87, 3.15)                       | 3.04 (2.85, 3.23) | 0.81             | 2.28 (2.18, 2.38)       | 2.39 (2.25, 2.53) | 0.17             |

|                         | Mead (95% confidence interval), umol/dL |                   |                  |                         |                   |                  |
|-------------------------|-----------------------------------------|-------------------|------------------|-------------------------|-------------------|------------------|
|                         | 10-14 gestational weeks                 |                   |                  | 15-26 gestational weeks |                   |                  |
| Amino acids             | Controls (n=214)                        | GDM (n=104)       | <i>p</i> -value* | Controls (n=214)        | GDM (n=94)        | <i>p</i> -value* |
| Hydroxyproline          | 1.14 (1.03, 1.24)                       | 1.17 (1.03, 1.32) | 0.69             | 1.16 (1.07, 1.24)       | 1.15 (1.02, 1.28) | 0.90             |
| Alpha-aminobutyric acid | 1.43 (1.37, 1.49)                       | 1.44 (1.37, 1.52) | 0.76             | 1.31 (1.23, 1.39)       | 1.31 (1.21, 1.42) | 0.97             |
| Cystine                 | 1.36 (1.08, 1.63)                       | 1.58 (1.27, 1.89) | 0.08             | 0.87 (0.60, 1.14)       | 1.10 (0.80, 1.40) | 0.04             |

Abbreviations: BCAA: branched chain amino acid, FDR: false-discovery rate, GDM: gestational diabetes mellitus

\* *P*-values for differences between case and control participants were obtained by linear mixed models with associated likelihood ratio tests, accounting for matched case-control pairs.

† Summed BCAAs: summed valine, leucine, and isoleucine.

‡ Summed aromatic amino acids: summed tyrosine and phenylalanine.

**Supplementary Table 2** Median and interquartile range of plasma amino acids among GDM cases and non-GDM controls at 10-14 and 15-26 weeks of gestation, the NICHD Fetal Growth Studies-Singleton Cohort

| Amino acids                      | Median (interquartile range), umol/dL |                   |                         |                   |
|----------------------------------|---------------------------------------|-------------------|-------------------------|-------------------|
|                                  | 10-14 gestational weeks               |                   | 15-26 gestational weeks |                   |
|                                  | Controls (n=214)                      | GDM (n=104)       | Controls (n=214)        | GDM (n=94)        |
| Glycine                          | 14.2 (12.0, 16.5)                     | 12.2 (11.0, 14.4) | 14.0 (12.3, 16.6)       | 12.5 (11.1, 14.6) |
| Alanine                          | 27.6 (24.5, 32.6)                     | 30.5 (26.8, 33.9) | 27.9 (24.4, 31.8)       | 30.3 (25.7, 33.7) |
| Aspartic acid                    | 0.62 (0.44, 0.86)                     | 0.78 (0.52, 1.02) | 0.88 (0.51, 1.25)       | 0.93 (0.60, 1.58) |
| Asparagine                       | 5.11 (4.25, 5.93)                     | 4.73 (4.03, 5.47) | 1.36 (3.58, 4.94)       | 4.22 (3.39, 4.83) |
| Arginine                         | 4.82 (4.14, 6.04)                     | 5.05 (4.30, 6.41) | 5.44 (4.20, 7.35)       | 5.44 (4.58, 7.99) |
| Glutamine                        | 35.0 (27.3, 39.0)                     | 34.4 (27.4, 38.6) | 27.3 (18.0, 38.4)       | 29.2 (15.8, 36.3) |
| Glutamic acid                    | 9.62 (6.3, 15.6)                      | 11.7 (7.2, 17.9)  | 13.0 (6.85, 24.2)       | 13.8 (8.42, 25.6) |
| Glutamine-to-glutamic acid-ratio | 3.50 (1.84, 6.07)                     | 3.28 (1.61, 5.71) | 2.05 (0.74, 5.56)       | 2.24 (0.59, 4.24) |
| Threonine                        | 12.1 (10.1, 13.7)                     | 12.8 (10.6, 14.9) | 14.9 (12.9, 16.9)       | 15.3 (13.2, 17.2) |
| Serine                           | 7.69 (6.65, 8.81)                     | 7.16 (6.07, 8.43) | 7.81 (6.90, 9.13)       | 7.82 (6.84, 9.39) |
| Methionine                       | 1.76 (1.47, 2.13)                     | 1.76 (1.49, 2.08) | 1.78 (1.58, 2.02)       | 1.85 (1.68, 2.14) |
| Histidine                        | 6.62 (6.16, 7.60)                     | 6.74 (6.00, 7.32) | 6.98 (6.35, 7.73)       | 6.86 (6.36, 7.39) |
| Lysine                           | 14.9 (13.1, 16.8)                     | 15.3 (12.8, 17.3) | 14.5 (13.3, 16.1)       | 15.0 (13.5, 16.9) |
| Proline                          | 12.7 (10.8, 15.2)                     | 12.0 (10.7, 15.3) | 11.4 (9.73, 14.3)       | 11.3 (9.62, 13.5) |
| BCAAs                            |                                       |                   |                         |                   |
| Valine                           | 18.0 (15.6, 21.0)                     | 18.4 (15.7, 21.6) | 16.1 (14.7, 17.5)       | 16.8 (15.2, 18.0) |
| Leucine                          | 9.08 (7.53, 10.9)                     | 8.99 (7.66, 10.9) | 8.17 (7.65, 8.99)       | 8.56 (7.69, 9.46) |
| Isoleucine                       | 5.01 (4.07, 6.03)                     | 5.29 (4.30, 6.37) | 4.78 (4.26, 5.24)       | 5.10 (4.44, 5.72) |
| Summed BCAAs*                    | 32.2 (27.3, 38.5)                     | 32.7 (27.9, 39.0) | 29.3 (26.9, 31.1)       | 30.5 (27.4, 33.3) |
| Aromatic amino acids             |                                       |                   |                         |                   |
| Phenylalanine                    | 5.01 (4.49, 5.93)                     | 5.10 (4.69, 5.82) | 4.54 (4.26, 4.91)       | 4.75 (4.40, 5.18) |

|                              | <b>Median (interquartile range), umol/dL</b> |                    |                                |                   |
|------------------------------|----------------------------------------------|--------------------|--------------------------------|-------------------|
|                              | <b>10-14 gestational weeks</b>               |                    | <b>15-26 gestational weeks</b> |                   |
| <b>Amino acids</b>           | <b>Controls (n=214)</b>                      | <b>GDM (n=104)</b> | <b>Controls (n=214)</b>        | <b>GDM (n=94)</b> |
| Tyrosine                     | 4.40 (3.69, 5.45)                            | 4.73 (4.10, 5.65)  | 3.85 (3.53, 4.27)              | 4.28 (3.79, 4.65) |
| Summed aromatic amino acids† | 9.54 (8.21, 11.4)                            | 10.0 (8.72, 11.3)  | 8.37 (7.83, 9.22)              | 9.09 (8.32, 9.62) |
| Others                       |                                              |                    |                                |                   |
| Taurine                      | 7.61 (5.48, 12.7)                            | 10.16 (5.58, 15.6) | 6.82 (4.44, 10.52)             | 7.78 (5.21, 11.8) |
| Citrulline                   | 1.72 (1.47, 2.02)                            | 1.76 (1.40, 2.13)  | 1.66 (1.47, 1.88)              | 1.64 (1.41, 1.96) |
| Ornithine                    | 2.81 (2.32, 3.45)                            | 2.88 (2.35, 3.55)  | 2.11 (1.82, 2.66)              | 2.23 (1.87, 2.68) |
| Hydroxyproline               | 0.99 (0.72, 1.35)                            | 1.07 (0.73, 1.48)  | 1.09 (0.78, 1.54)              | 1.11 (0.78, 1.45) |
| Alpha-aminobutyric acid      | 1.37 (1.16, 1.64)                            | 1.36 (1.10, 1.78)  | 1.30 (1.04, 1.58)              | 1.34 (1.12, 1.57) |
| Cystine                      | 0.66 (0.07, 2.40)                            | 0.98 (0.06, 2.74)  | 0.42 (0.08, 0.92)              | 0.57 (0.06, 1.41) |

Abbreviations: BCAA: branched chain amino acid, GDM: gestational diabetes mellitus

\* Summed BCAAs: summed valine, leucine, and isoleucine.

† Summed aromatic amino acids: summed tyrosine and phenylalanine.

**Supplementary Table 3** Adjusted odds ratios of gestational diabetes mellitus risk associated with individual and grouped plasma amino acids with additional adjustment of glucose or HbA1c at 10-14 weeks of gestation, the NICHD Fetal Growth Studies-Singleton Cohort

| <b>Adjusted OR (95% CI) for risk of GDM by quartiles of plasma amino acids*</b> |                               |                   |                   |                   |                              |                                  |
|---------------------------------------------------------------------------------|-------------------------------|-------------------|-------------------|-------------------|------------------------------|----------------------------------|
| <b>Amino acids</b>                                                              | Further adjusting for glucose |                   |                   |                   | <i>p</i> -trend <sup>†</sup> | Continuous (per SD) <sup>‡</sup> |
|                                                                                 | Q1                            | Q2                | Q3                | Q4                |                              |                                  |
| Glycine                                                                         | 1.00 (REF)                    | 0.43 (0.19, 0.96) | 0.40 (0.16, 0.98) | 0.25 (0.09, 0.66) | 0.008                        | 0.57 (0.39, 0.83)                |
| Alanine                                                                         | 1.00 (REF)                    | 1.92 (0.78, 4.74) | 2.07 (0.87, 4.95) | 2.69 (1.09, 6.65) | 0.04                         | 1.30 (0.95, 1.77)                |
| Glutamic acid                                                                   | 1.00 (REF)                    | 0.94 (0.41, 2.18) | 1.57 (0.60, 4.09) | 2.54 (0.86, 7.52) | 0.05                         | 1.48 (1.02, 2.15)                |
| <b>Amino acids</b>                                                              | Further adjusting for HbA1c   |                   |                   |                   | <i>p</i> -trend              | Continuous (per SD)              |
|                                                                                 | Q1                            | Q2                | Q3                | Q4                |                              |                                  |
| Glycine                                                                         | 1.00 (REF)                    | 0.34 (0.14, 0.79) | 0.33 (0.13, 0.85) | 0.25 (0.10, 0.64) | 0.01                         | 0.55 (0.38, 0.80)                |
| Alanine                                                                         | 1.00 (REF)                    | 1.80 (0.73, 4.46) | 2.97 (1.23, 7.21) | 2.94 (1.19, 7.26) | 0.007                        | 1.39 (1.03, 1.87)                |
| Glutamic acid                                                                   | 1.00 (REF)                    | 0.77 (0.34, 1.76) | 1.27 (0.50, 3.19) | 1.90 (0.66, 5.53) | 0.12                         | 1.38 (0.94, 2.01)                |

Abbreviations: CI: confidence interval, GDM: gestational diabetes mellitus, OR: odds ratio, SD: standard deviation

\* Models were adjusted for family history of diabetes (yes, no), nulliparity (yes/no), pre-pregnancy body mass index (<25.0, 25.0–29.9, 30.0–34.9, 35.0–44.9 kg/m<sup>2</sup>), maternal age (years), and gestational week at the time of blood draw.

<sup>†</sup> Tests of linear trend were conducted by using the median value for each quartile and fitted as a continuous variable in the conditional logistic regression models. *P*-value<0.05 after FDR correction was marked with \*\*; none of the amino acids at 10-14 weeks was statistically significant after false-discovery rate correction.

<sup>‡</sup> ORs (95% CIs) for continuous amino acids (per standard deviation) were presented for those amino acids whose *p*-trend was significant (i.e., *p*-value<0.05).

**Supplementary Table 4** Adjusted odds ratios of gestational diabetes mellitus risk associated with individual and grouped plasma amino acids with additional adjustment of fasting glucose or HbA1c at 15-26 weeks of gestation, the NICHD Fetal Growth Studies-Singleton Cohort

| <b>Adjusted odds ratios (95% CI) for risk of GDM by quartiles of plasma amino acids*</b> |                               |                   |                   |                   |          |                   |                      |
|------------------------------------------------------------------------------------------|-------------------------------|-------------------|-------------------|-------------------|----------|-------------------|----------------------|
| <b>Amino acids</b>                                                                       | Further adjusting for glucose |                   |                   |                   |          | <i>p</i> -trend†  | Continuous (per SD)‡ |
|                                                                                          | Q1                            | Q2                | Q3                | Q4                |          |                   |                      |
| Glycine                                                                                  | 1.00 (REF)                    | 0.73 (0.30, 1.73) | 0.32 (0.12, 0.83) | 0.13 (0.04, 0.40) | 0.0002** | 0.82 (0.72, 0.93) |                      |
| Alanine                                                                                  | 1.00 (REF)                    | 0.67 (0.25, 1.80) | 0.80 (0.27, 2.35) | 1.44 (0.52, 4.01) | 0.24     |                   |                      |
| Isoleucine                                                                               | 1.00 (REF)                    | 2.23 (0.79, 6.29) | 0.81 (0.29, 2.30) | 2.13 (0.80, 5.68) | 0.27     |                   |                      |
| Phenylalanine                                                                            | 1.00 (REF)                    | 1.01 (0.38, 2.68) | 1.24 (0.48, 3.20) | 1.49 (0.60, 3.68) | 0.31     |                   |                      |

  

| <b>Adjusted odds ratios (95% CI) for risk of GDM by quartiles of plasma amino acids*</b> |                                     |                   |                   |                   |          |                   |                     |
|------------------------------------------------------------------------------------------|-------------------------------------|-------------------|-------------------|-------------------|----------|-------------------|---------------------|
| <b>Amino acids</b>                                                                       | Further adjusting for fasting HbA1c |                   |                   |                   |          | <i>p</i> -trend   | Continuous (per SD) |
|                                                                                          | Q1                                  | Q2                | Q3                | Q4                |          |                   |                     |
| Glycine                                                                                  | 1.00 (REF)                          | 0.76 (0.34, 1.69) | 0.31 (0.12, 0.78) | 0.15 (0.05, 0.43) | 0.0002** | 0.50 (0.34, 0.76) |                     |
| Alanine                                                                                  | 1.00 (REF)                          | 1.00 (0.39, 2.57) | 1.28 (0.48, 3.44) | 2.94 (1.16, 7.45) | 0.008    | 1.43 (1.03, 1.97) |                     |
| Isoleucine                                                                               | 1.00 (REF)                          | 1.75 (0.65, 4.76) | 1.32 (0.49, 3.54) | 3.02 (1.17, 7.82) | 0.03     | 1.59 (1.14, 2.21) |                     |
| Phenylalanine                                                                            | 1.00 (REF)                          | 0.95 (0.38, 2.41) | 1.38 (0.56, 3.40) | 1.85 (0.76, 4.48) | 0.10     | 1.13 (0.84, 1.52) |                     |

Abbreviations: CI: confidence interval, GDM: gestational diabetes mellitus, OR: odds ratio, SD: standard deviation

\* Models were adjusted for family history of diabetes (yes, no), nulliparity (yes/no), (<25.0, 25.0–29.9, 30.0–34.9, 35.0–44.9 kg/m<sup>2</sup>), maternal age (years), and gestational week at the time of blood draw.

† Tests of linear trend were conducted by using the median value for each quartile and fitted as a continuous variable in the conditional logistic regression models. *P*-value<0.05 after FDR correction was marked with \*\*.

‡ ORs (95% CIs) for continuous amino acids (per standard deviation) were presented for those amino acids whose *p*-trend was significant (i.e., *p*-value<0.05).

**Supplementary Table 5** Adjusted odds ratios of gestational diabetes mellitus associated with continuous per standard deviation increment of plasma amino acids at 10-14 weeks of gestation stratified by major risk factors, the NICHD Fetal Growth Studies-Singleton Cohort

| <b>Adjusted odds ratios (95% CI) for risk of GDM by per SD increment of plasma amino acids*</b> |                   |                   |                      |                      |
|-------------------------------------------------------------------------------------------------|-------------------|-------------------|----------------------|----------------------|
| <b>Covariate</b>                                                                                | <b>Glycine</b>    | <b>Alanine</b>    | <b>Aspartic acid</b> | <b>Glutamic acid</b> |
| <b>Race/ethnicity</b>                                                                           |                   |                   |                      |                      |
| White                                                                                           | 0.51 (0.26, 1.01) | 1.59 (0.81, 3.09) | 1.50 (0.94, 2.40)    | 1.30 (0.76, 2.22)    |
| Black                                                                                           | 0.75 (0.28, 2.04) | 1.91 (0.86, 4.26) | 1.79 (0.67, 4.79)    | 1.21 (0.52, 2.80)    |
| Hispanic                                                                                        | 0.50 (0.28, 0.92) | 0.99 (0.63, 1.55) | 1.26 (0.85, 1.86)    | 1.21 (0.80, 1.84)    |
| Asian                                                                                           | 0.53 (0.25, 1.10) | 2.02 (1.09, 3.73) | 2.17 (1.07, 4.43)    | 1.16 (0.65, 2.07)    |
| <b>Family history of diabetes</b>                                                               |                   |                   |                      |                      |
| No                                                                                              | 0.49 (0.31, 0.76) | 1.40 (1.02, 1.90) | 1.57 (1.18, 2.08)    | 1.23 (0.89, 1.80)    |
| Yes                                                                                             | 0.70 (0.42, 1.18) | 1.28 (0.73, 2.24) | 1.10 (0.65, 1.87)    | 1.07 (0.69, 1.65)    |
| <b>Nulliparity</b>                                                                              |                   |                   |                      |                      |
| No                                                                                              | 0.59 (0.38, 0.90) | 1.03 (0.71, 1.49) | 1.28 (0.96, 1.70)    | 1.12 (0.81, 1.55)    |
| Yes                                                                                             | 0.56 (0.33, 0.95) | 1.90 (1.26, 2.87) | 1.87 (1.17, 2.96)    | 1.28 (0.85, 1.93)    |
| <b>Pre-pregnancy BMI, kg/m<sup>2</sup></b>                                                      |                   |                   |                      |                      |
| <30.0                                                                                           | 0.56 (0.38, 0.81) | 1.43 (1.06, 1.91) | 1.58 (1.19, 2.11)    | 1.13 (0.86, 1.48)    |
| ≥30.0                                                                                           | 0.64 (0.30, 1.38) | 1.30 (0.66, 2.55) | 1.18 (0.75, 1.88)    | 1.52 (0.72, 3.21)    |

Abbreviations: CI: confidence interval, GDM: gestational diabetes mellitus, SD: standard deviation

\* Models were adjusted for family history of diabetes (yes, no), nulliparity (yes/no), pre-pregnancy body mass index (<25.0, 25.0–29.9, 30.0–34.9, 35.0–44.9 kg/m<sup>2</sup>), maternal age (years), and gestational week at the time of blood draw.



**Supplementary Table 6** Adjusted odds ratios of gestational diabetes mellitus associated with continuous per standard deviation increment of plasma amino acids at 15-26 weeks of gestation stratified by major risk factors, the NICHD Fetal Growth Studies-Singleton Cohort

| <b>Adjusted odds ratios (95% CI) for risk of GDM by per SD increment of plasma amino acids*</b> |                   |                   |                   |                                       |                   |                   |                   |
|-------------------------------------------------------------------------------------------------|-------------------|-------------------|-------------------|---------------------------------------|-------------------|-------------------|-------------------|
| <b>Covariate</b>                                                                                | Glycine           | Alanine           | Aspartic acid     | Glutamine-<br>glutamic acid-<br>ratio | Isoleucine        | Phenylalanine     | Tyrosine          |
| <b>Race/ethnicity</b>                                                                           |                   |                   |                   |                                       |                   |                   |                   |
| White                                                                                           | 0.61 (0.31, 1.22) | 1.11 (0.63, 1.95) | 1.38 (0.77, 2.44) | 0.95 (0.50, 1.78)                     | 1.26 (0.57, 2.80) | 2.30 (0.88, 6.00) | 1.96 (0.96, 4.02) |
| Black                                                                                           | 0.89 (0.31, 2.55) | 2.18 (0.94, 5.07) | 1.57 (0.71, 2.44) | 0.52 (0.15, 1.84)                     | 1.01 (0.45, 2.26) | 0.87 (0.46, 1.62) | 1.79 (0.83, 3.84) |
| Hispanic                                                                                        | 0.52 (0.28, 0.97) | 1.30 (0.81, 2.08) | 1.48 (0.93, 2.36) | 0.79 (0.43, 1.46)                     | 1.39 (0.93, 2.07) | 0.97 (0.65, 1.44) | 1.54 (0.99, 2.38) |
| Asian                                                                                           | 0.39 (0.16, 0.95) | 1.44 (0.78, 2.65) | 1.01 (0.56, 1.85) | 0.73 (0.29, 1.85)                     | 3.19 (1.39, 7.28) | 1.13 (0.75, 1.69) | 1.41 (0.67, 2.97) |
| <b>Family history of diabetes</b>                                                               |                   |                   |                   |                                       |                   |                   |                   |
| No                                                                                              | 0.56 (0.36, 0.86) | 1.38 (1.01, 1.90) | 1.57 (1.16, 2.13) | 0.61 (0.38, 1.01)                     | 1.92 (1.36, 2.72) | 1.27 (0.96, 1.69) | 1.74 (1.25, 2.43) |
| Yes                                                                                             | 0.75 (0.41, 1.35) | 1.40 (0.81, 2.41) | 0.83 (0.47, 1.46) | 1.00 (0.60, 1.69)                     | 0.86 (0.51, 1.44) | 0.79 (0.47, 1.33) | 1.23 (0.73, 2.05) |
| <b>Nulliparity</b>                                                                              |                   |                   |                   |                                       |                   |                   |                   |
| No                                                                                              | 0.70 (0.47, 1.04) | 1.34 (0.94, 1.91) | 1.40 (1.00, 1.95) | 0.73 (0.40, 1.33)                     | 1.48 (1.03, 2.14) | 1.16 (0.87, 1.55) | 1.66 (1.15, 2.41) |
| Yes                                                                                             | 0.48 (0.26, 0.90) | 1.48 (0.98, 2.25) | 1.25 (0.82, 1.92) | 0.80 (0.53, 1.21)                     | 1.47 (0.96, 2.25) | 1.00 (0.67, 1.48) | 1.39 (0.91, 2.11) |
| <b>Pre-pregnancy BMI, kg/m<sup>2</sup></b>                                                      |                   |                   |                   |                                       |                   |                   |                   |
| <30.0                                                                                           | 0.56 (0.39, 0.83) | 1.36 (1.00, 1.85) | 1.23 (0.92, 1.65) | 0.81 (0.56, 1.17)                     | 1.79 (1.29, 2.49) | 1.12 (0.86, 1.47) | 1.50 (1.10, 2.04) |
| ≥30.0                                                                                           | 0.86 (0.37, 2.00) | 1.52 (0.83, 2.79) | 1.68 (0.88, 3.23) | 0.64 (0.27, 1.53)                     | 0.85 (0.45, 1.48) | 1.03 (0.62, 1.72) | 1.61 (0.83, 3.12) |

Abbreviations: CI: confidence interval, GDM: gestational diabetes mellitus, SD: standard deviation

\* Models were adjusted for family history of diabetes (yes, no), nulliparity (yes/no), pre-pregnancy body mass index (<25.0, 25.0–29.9, 30.0–34.9, 35.0–44.9 kg/m<sup>2</sup>), maternal age (years), and gestational week at the time of blood draw.

**Supplementary Figure 1** Heatmap of partial Spearman’s correlation coefficients between plasma amino acids at 10-14 weeks of gestation and fasting plasma cardiometabolic biomarkers at 15-26 weeks of gestation among non-GDM controls, the NICHD Fetal Growth Studies-Singleton Cohort. Partial Spearman correlation coefficient was calculated with adjustment of family history of diabetes (yes, no), nulliparity (yes/no pre-pregnancy body mass index (<25.0, 25.0–29.9, 30.0–34.9, 35.0–44.9 kg/m<sup>2</sup>), maternal age, and gestational week at the time of blood draw.

| Amino acid              | Glucose | HbA1c | Insulin | C-peptide | hs-CRP | HOMA-IR | HMW adiponectin | HDL-C | LDL-C | Triglycerides |
|-------------------------|---------|-------|---------|-----------|--------|---------|-----------------|-------|-------|---------------|
| Glycine                 | 0.10    | -0.22 | -0.16   | -0.10     | -0.11  | -0.14   | 0.18            | -0.09 | -0.02 | -0.11         |
| Alanine                 | 0.22    | -0.04 | 0.12    | 0.13      | -0.04  | 0.14    | -0.09           | -0.03 | 0.10  | 0.07          |
| Aspartic acid           | 0.06    | -0.06 | 0.10    | -0.06     | 0.01   | -0.13   | -0.05           | -0.22 | 0.01  | 0.15          |
| Asparagine              | 0.01    | -0.03 | -0.13   | -0.15     | -0.28  | -0.12   | 0.03            | 0.12  | 0.11  | -0.07         |
| Arginine                | 0.12    | 0.07  | 0.03    | -0.05     | 0.03   | 0.01    | -0.02           | 0.09  | -0.04 | -0.11         |
| Glutamine               | -0.04   | -0.01 | 0.08    | 0.01      | -0.14  | -0.06   | 0.10            | 0.15  | 0.04  | -0.03         |
| Glutamic acid           | 0.14    | -0.06 | -0.02   | 0.01      | 0.01   | 0.04    | -0.08           | -0.18 | -0.07 | 0.05          |
| Threonine               | 0.13    | 0.13  | 0.06    | -0.01     | -0.09  | 0.08    | -0.09           | 0.11  | -0.03 | -0.07         |
| Serine                  | 0.15    | 0.04  | -0.01   | -0.05     | -0.21  | 0.01    | -0.02           | 0.04  | -0.05 | -0.06         |
| Methionine              | 0.09    | 0.08  | -0.10   | -0.09     | -0.02  | -0.05   | 0.03            | 0.18  | -0.01 | -0.13         |
| Histidine               | 0.13    | -0.01 | -0.06   | 0.04      | -0.08  | 0.03    | 0.08            | 0.10  | -0.01 | -0.08         |
| Lysine                  | 0.10    | 0.06  | -0.06   | 0.07      | 0.06   | 0.09    | -0.01           | 0.13  | -0.05 | -0.04         |
| Proline                 | 0.08    | 0.03  | -0.06   | 0.02      | 0.04   | 0.03    | 0.03            | 0.07  | 0.12  | -0.07         |
| Valine                  | 0.21    | 0.15  | 0.06    | 0.07      | -0.09  | 0.08    | -0.05           | 0.17  | -0.01 | -0.06         |
| Leucine                 | 0.17    | 0.11  | 0.03    | 0.06      | -0.07  | 0.05    | 0.03            | 0.16  | -0.02 | -0.09         |
| Isoleucine              | 0.17    | 0.10  | -0.03   | 0.05      | -0.10  | 0.06    | 0.01            | 0.15  | -0.01 | -0.07         |
| Phenylalanine           | 0.14    | 0.11  | 0.02    | 0.04      | -0.06  | 0.03    | 0.07            | 0.15  | 0.03  | -0.08         |
| Tyrosine                | 0.11    | 0.01  | -0.06   | 0.04      | 0.01   | 0.04    | 0.10            | 0.14  | 0.05  | -0.13         |
| Taurine                 | 0.02    | 0.01  | -0.21   | -0.09     | 0.03   | -0.19   | -0.02           | -0.19 | -0.04 | 0.11          |
| Citrulline              | -0.01   | 0.04  | 0.07    | -0.07     | -0.09  | -0.10   | 0.01            | 0.09  | -0.08 | -0.12         |
| Ornithine               | 0.02    | 0.06  | 0.07    | 0.03      | -0.05  | -0.02   | 0.04            | 0.03  | -0.07 | -0.06         |
| Hydroxyproline          | 0.03    | 0.07  | 0.01    | -0.07     | -0.08  | -0.05   | -0.17           | -0.04 | -0.06 | -0.05         |
| Alpha-aminobutyric acid | 0.18    | 0.17  | -0.02   | 0.05      | -0.08  | 0.10    | -0.07           | 0.04  | -0.11 | -0.01         |
| Cystine                 | 0.04    | 0.10  | 0.03    | -0.06     | 0.07   | -0.02   | -0.03           | 0.05  | 0.10  | 0.02          |

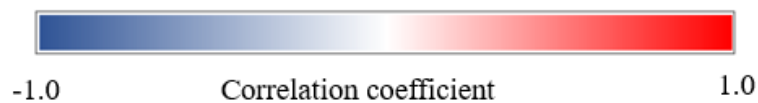

Supplement: Supplementary file 1 [file 38684809]
